# Supplementary material for: The efficiency of Hg cold vapor generation and its influence on Hg isotope analysis by MC-ICP-MS
Source: Royal Society of Chemistry journal article supplement (doi:10.1039/d3ja00056g), 2023-01-01
Supplement: d3ja00056g1.pdf [file d3ja00056g1.pdf]

## Supporting Information

### **The efficiency of Hg cold vapor generation and its influence on Hg isotope analysis by MC-ICP-MS**

Miao Shi,<sup>a</sup> Bridget A. Bergquist,<sup>b</sup> Anwen Zhou,<sup>a, c</sup> Yaqiu Zhao,<sup>a</sup> Ruoyu Sun,<sup>a</sup> Jiubin Chen,<sup>a</sup> Wang Zheng<sup>\*a</sup>

<sup>a</sup> *School of Earth System Science, Institute of Surface-Earth System Science, Tianjin University, Tianjin 300072, China.*

<sup>b</sup> *Department of Earth Sciences, University of Toronto, Toronto, Ontario, M5S 2B1, Canada*

<sup>c</sup> *Department of Earth, Ocean and Atmospheric Science and National High Magnetic Field Laboratory, Florida State University, Tallahassee, FL 32306, USA*

\*Corresponding author: Wang Zheng (zhengw3@tju.edu.cn)

Contents of this file

Text S1 The effect of HNO<sub>3</sub> concentration

Text S2 Calculation of  $\delta^{202}\text{Hg}$  caused by the NIST 2702 matrix

Text S3 Calculation of the Hg isotope enrichment factor in the humic acid experiment

### **Text S1 The effect of HNO<sub>3</sub> concentration**

High acid concentrations are shown to cause significant deviations of measured isotope ratios from true values for metal isotope systems that use a pneumatic nebulization sample introduction method, such as Fe isotopes,<sup>1, 2</sup> probably due to changes in instrumental mass discrimination caused by sample acid strength. We observed that the suppression of CVG efficiency increased with the increase of HCl concentration in sample matrix (see Section 3.2.1 in the main text). However, this suppression could be caused by either the high chloride concentration or the high acid strength. To distinguish these two factors, we performed additional experiments that replace HCl with HNO<sub>3</sub>, which allows for us to assess the effect of acid strength only. We tested the Hg CVG efficiency and Hg isotope fractionation during CVG at 30% and 50% (v/v) HNO<sub>3</sub> concentrations (corresponding to H<sup>+</sup> concentrations of 4.2 and 7.0 M, respectively) using GLS II. The results showed that sample acidity had no significant influence on Hg isotope analysis using CVG. As shown in Figure S2, the average Hg CVG efficiency at 30% and 50% HNO<sub>3</sub> concentration was 95.9% ± 1.7% (2SD, n = 2) and 95.93% ± 1.8% (2SD, n = 2), respectively. Both δ<sup>202</sup>Hg and Δ<sup>199</sup>Hg were within the range of uncertainty.

## Text S2 Calculation of $\delta^{202}\text{Hg}$ caused by the NIST 2702 matrix

Since the Hg isotope fractionation caused by the NIST 2702 matrix was most likely caused by incomplete Hg(II) reduction and inhibited Hg(0) volatilization during CVG (see Section 3.2.2), and both processes can be modeled with a Rayleigh fractionation<sup>3</sup>, the observed  $\delta^{202}\text{Hg}$  can be calculated using a Rayleigh fractionation equation according to Criss<sup>4</sup> using the experimental Hg isotope fractionation enrichment factors of Hg(II) reduction ( $\epsilon^{202}\text{Hg} = -1.5$  to  $-1.8$ )<sup>5</sup> and Hg(0) volatilization ( $\epsilon^{202}\text{Hg} = \sim -0.5$ )<sup>6</sup>:

$$\frac{\delta^{202}\text{Hg}+1000}{\delta_{\text{initial}}^{202}\text{Hg}+1000} = f \alpha_{\text{g-aq}}^{202}\text{Hg}-1 \quad (1)$$

where  $\alpha_{\text{g-aq}}^{202}\text{Hg}$  is the fractionation factor and is calculated from the enrichment factor according to:  $\epsilon^{202}\text{Hg} = 1000 \cdot \ln \alpha_{\text{g-aq}}^{202}\text{Hg}$ .  $f$  is the fraction of remaining reactant, which is equivalent to the suppression of Hg CVG efficiency (calculated as 100% - CVG efficiency).  $\delta_{\text{initial}}^{202}\text{Hg}$  represents the original  $\delta^{202}\text{Hg}$  value of NIST 2702, which is  $-0.79\text{‰}$  (Table 1). Therefore, if the suppression of Hg CVG efficiency of GLS I were completely caused by either inhibited Hg(0) volatilization or incomplete Hg(II) reduction, the predicted  $\delta^{202}\text{Hg}$  of GLS I calculated using equation (1) is  $-1.23\text{‰}$  and  $-2.38\text{‰}$ , respectively. The predicted  $\delta^{202}\text{Hg}$  of GLS II calculated using the experimental enrichment factor of Hg(II) reduction is  $-1.68\text{‰}$ .

### **Text S3 Calculation of the Hg isotope enrichment factor in the humic acid experiment**

In the humic acid experiments, our results showed a generally higher  $\delta^{202}\text{Hg}$  in the gaseous  $\text{Hg}(0)$  produced by  $\text{Hg}(\text{II})$  reduction (i.e., the  $\delta^{202}\text{Hg}$  in the trapping solution) than the initial  $\delta^{202}\text{Hg}$  (i.e., the initial  $\delta^{202}\text{Hg}$  of NIST 3133, which is 0) during CVG, suggesting that heavier isotopes were preferentially reduced. Moreover,  $\delta^{202}\text{Hg}$  of the  $\text{Hg}$  that was transmitted (i.e.,  $\text{Hg}$  collected by the trapping solution) decreased linearly toward the initial  $\delta^{202}\text{Hg}$  as  $\text{Hg}$  CVG efficiency increased. These fractionation patterns are consistent with a closed system equilibrium isotope fractionation, which predicts that heavier isotopes tend to enrich in species with a stronger bonding environment and that the isotope ratio of the product shifts linearly toward the starting isotope ratio of the reactant.<sup>7</sup> The equilibrium enrichment factor ( $\epsilon^{202}\text{Hg}_{\text{g-aq}}$ ) is typically determined from the constant difference in  $\delta^{202}\text{Hg}$  values between the product and reactant ( $\epsilon^{202}\text{Hg}_{\text{g-aq}} = \delta^{202}\text{Hg}_{\text{product}} - \delta^{202}\text{Hg}_{\text{reactant}}$ ). In this experiment, the  $\delta^{202}\text{Hg}_{\text{product}}$  refers to the  $\delta^{202}\text{Hg}$  of  $\text{Hg}(0)$  reduced from  $\text{Hg}(\text{II})$  complexed by weak binding sites of humic acid, which is equivalent to the  $\delta^{202}\text{Hg}$  of the trapping solution, but  $\delta^{202}\text{Hg}_{\text{reactant}}$  could not be measured. However, the equilibrium enrichment factor  $\epsilon^{202}\text{Hg}$  can be estimated from intercepts of linear regressions of  $\delta^{202}\text{Hg}_{\text{product}}$  versus the  $\text{Hg}$  CVG efficiency (i.e., the initial  $\delta^{202}\text{Hg}_{\text{product}}$  at 0%  $\text{Hg}$  CVG efficiency where  $\delta^{202}\text{Hg}_{\text{reactant}} = 0$ ). According to Figure S3, the  $\epsilon^{202}\text{Hg}_{\text{g-aq}}$  values in the humic acid experiment are  $0.31 \pm 0.14$  and  $0.67 \pm 0.21$  (1SE) for GLS I and GLS II, respectively.

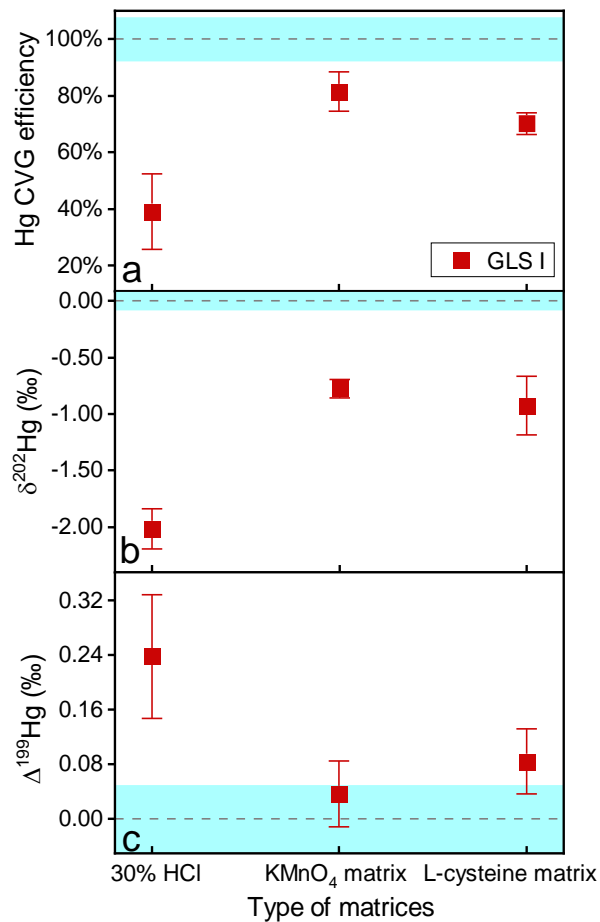

**Figure S1.** The effects of 30% HCl (3.3M), the KMnO<sub>4</sub> matrix and L-cysteine matrix on a) Hg CVG efficiency, b)  $\delta^{202}\text{Hg}$  and c)  $\Delta^{199}\text{Hg}$  at a sample uptake rate of 3.5 mL·min<sup>-1</sup> for GLS I.

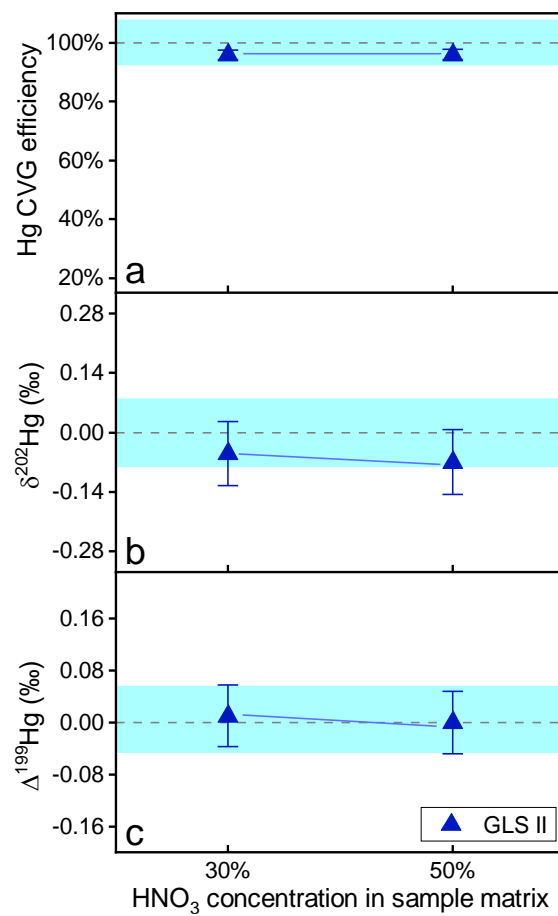

**Figure S2.** The effect of HNO<sub>3</sub> concentration on a) Hg CVG efficiency, b) δ<sup>202</sup>Hg and c) Δ<sup>199</sup>Hg for GLS II.

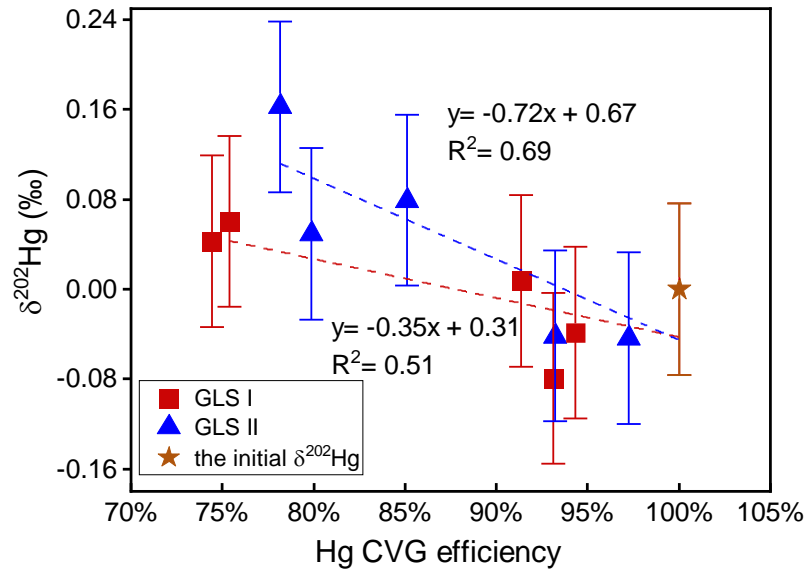

**Figure S3.** Plots of  $\delta^{202}\text{Hg}$  versus Hg CVG efficiency in the humic acid experiment.

## Reference:

1. N. Dauphas, A. Pourmand and F. Z. Teng, *Chem. Geol.*, 2009, **267**, 175-184.
2. D. Malinovsky, A. Stenberg, I. Rodushkin, H. Andren, J. Ingri, B. Öhlander and D. C. Baxter, *J. Anal. At. Spectrom.*, 2003, **18**, 687-695.
3. B. A. Bergquist and J. D. Blum, *Science*, 2007, **318**, 417-420.
4. R. E. Criss, *Principles of Stable Isotope Distribution*, Oxford University Press, USA, 1999.
5. W. Zheng and H. Hintelmann, *J. Anal. At. Spectrom.*, 2010, **114**, 4238-4245.
6. W. Zheng, D. Foucher and H. Hintelmann, *J. Anal. At. Spectrom.*, 2007, **22**, 1097-1104.
7. W. Zheng, J. D. Demers, X. Lu, B. A. Bergquist, A. D. Anbar, J. D. Blum and B. Gu, *Environ. Sci. Technol.*, 2019, **53**, 1853-1862.
